# Supplementary material
Source: publisher figshare collection journal article supplement (https://acs.figshare.com/ndownloader/files/5759127)

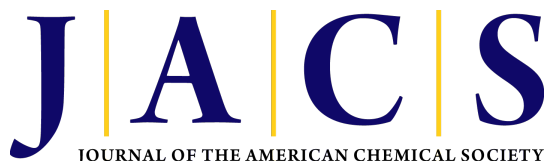

JOURNAL OF THE AMERICAN CHEMICAL SOCIETY

J. Am. Chem. Soc., 1998, 120(28), 7103-7104, DOI:[10.1021/ja980432y](https://doi.org/10.1021/ja980432y)

#### Terms & Conditions

Electronic Supporting Information files are available without a subscription to ACS Web Editions. The American Chemical Society holds a copyright ownership interest in any copyrightable Supporting Information. Files available from the ACS website may be downloaded for personal use only. Users are not otherwise permitted to reproduce, republish, redistribute, or sell any Supporting Information from the ACS website, either in whole or in part, in either machine-readable form or any other form without permission from the American Chemical Society. For permission to reproduce, republish and redistribute this material, requesters must process their own requests via the RightsLink permission system. Information about how to use the RightsLink permission system can be found at <http://pubs.acs.org/page/copyright/permissions.html>

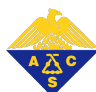

ACS Publications

MOST TRUSTED. MOST CITED. MOST READ.

Copyright © 1998 American Chemical Society

## Supplementary Material

RECEIVED MAY 13 1999

for

**Differential Binding of Iron(III) and Zinc(II) Protoporphyrin IX to  
Synthetic Four-Helix Bundles**

by

R. Eryl Sharp,<sup>†</sup> James R. Diers,<sup>‡</sup> David F. Bocian,<sup>‡</sup> and P. Leslie Dutton<sup>\*,†</sup>

*The Johnson Research Foundation, Department of Biochemistry and Biophysics,  
University of Pennsylvania, Philadelphia, Pennsylvania 19104*

and

*Department of Chemistry, University of California, Riverside, California 92521*

**Figure S1.** Stack plot of the high-frequency regions of Soret-excitation resonance Raman spectra for  $[\alpha A22-l-\alpha H41]_2 : \text{Fe(III)-PP}$  (1:1),  $[\alpha H22-l-\alpha H41]_2 : \text{Fe(III)-PP}$  (1:2) and  $[\alpha H22-l-\alpha H41]_2 : \text{Fe(III)-PP}$  (1:1). The spectra of the Fe(III)-PP in all three maquettes are the same within experimental error. The frequencies of the ring skeletal modes ( $\nu^2$ , 1557  $\text{cm}^{-1}$ ;  $\nu^3$ , 1503  $\text{cm}^{-1}$ ;  $\nu^4$ , 1374  $\text{cm}^{-1}$ ) are totally consistent with low-spin, six-coordinate Fe(III)-PP.<sup>1</sup> Accordingly, the Fe(III)-PP cofactor in  $[\alpha A22-l-\alpha H41]_2$  must bridge the two helix-loop-helix monomers.

**Figure S2.** Low-frequency region of the Soret-excitation resonance Raman spectrum of  $[\alpha H22-l-\alpha H41]_2 : \text{Zn(II)-PP}$  (1:2). The key observation is the presence of a moderately strong band at  $\sim 158 \text{ cm}^{-1}$ , which is assignable to the Zn(II)-His stretching mode.<sup>2</sup> This band is absent from the spectrum of four-coordinate Zn(II)-PP. Accordingly, the Zn(II)-PP is bound to the peptide and must be five-coordinate. There is no issue of whether Zn(II)-PP is five- versus six-coordinate, even under the most severe conditions (such as in the

presence of 4 M imidazole). Also, metal-His stretches are not observed for six-coordinate metalloporphyrins.<sup>1b</sup>

## References

1. (a) Choi, S.; Spiro, T. G.; Langry, K. C.; Smith, K. M.; Budd, D.; Lamar, G. N. *J. Am. Chem. Soc.* **1982**, *104*, 4345-4351. (b) Spiro, T. G. in *Iron Porphyrins*; Lever, A. P. B.; Gray, H. B., Eds.: Addison Wesley: Reading, MA, 1983, pp89-160.
2. Feitelson, J.; Spiro, T. G. *Inorg. Chem.* **1986**, *25*, 861-865.

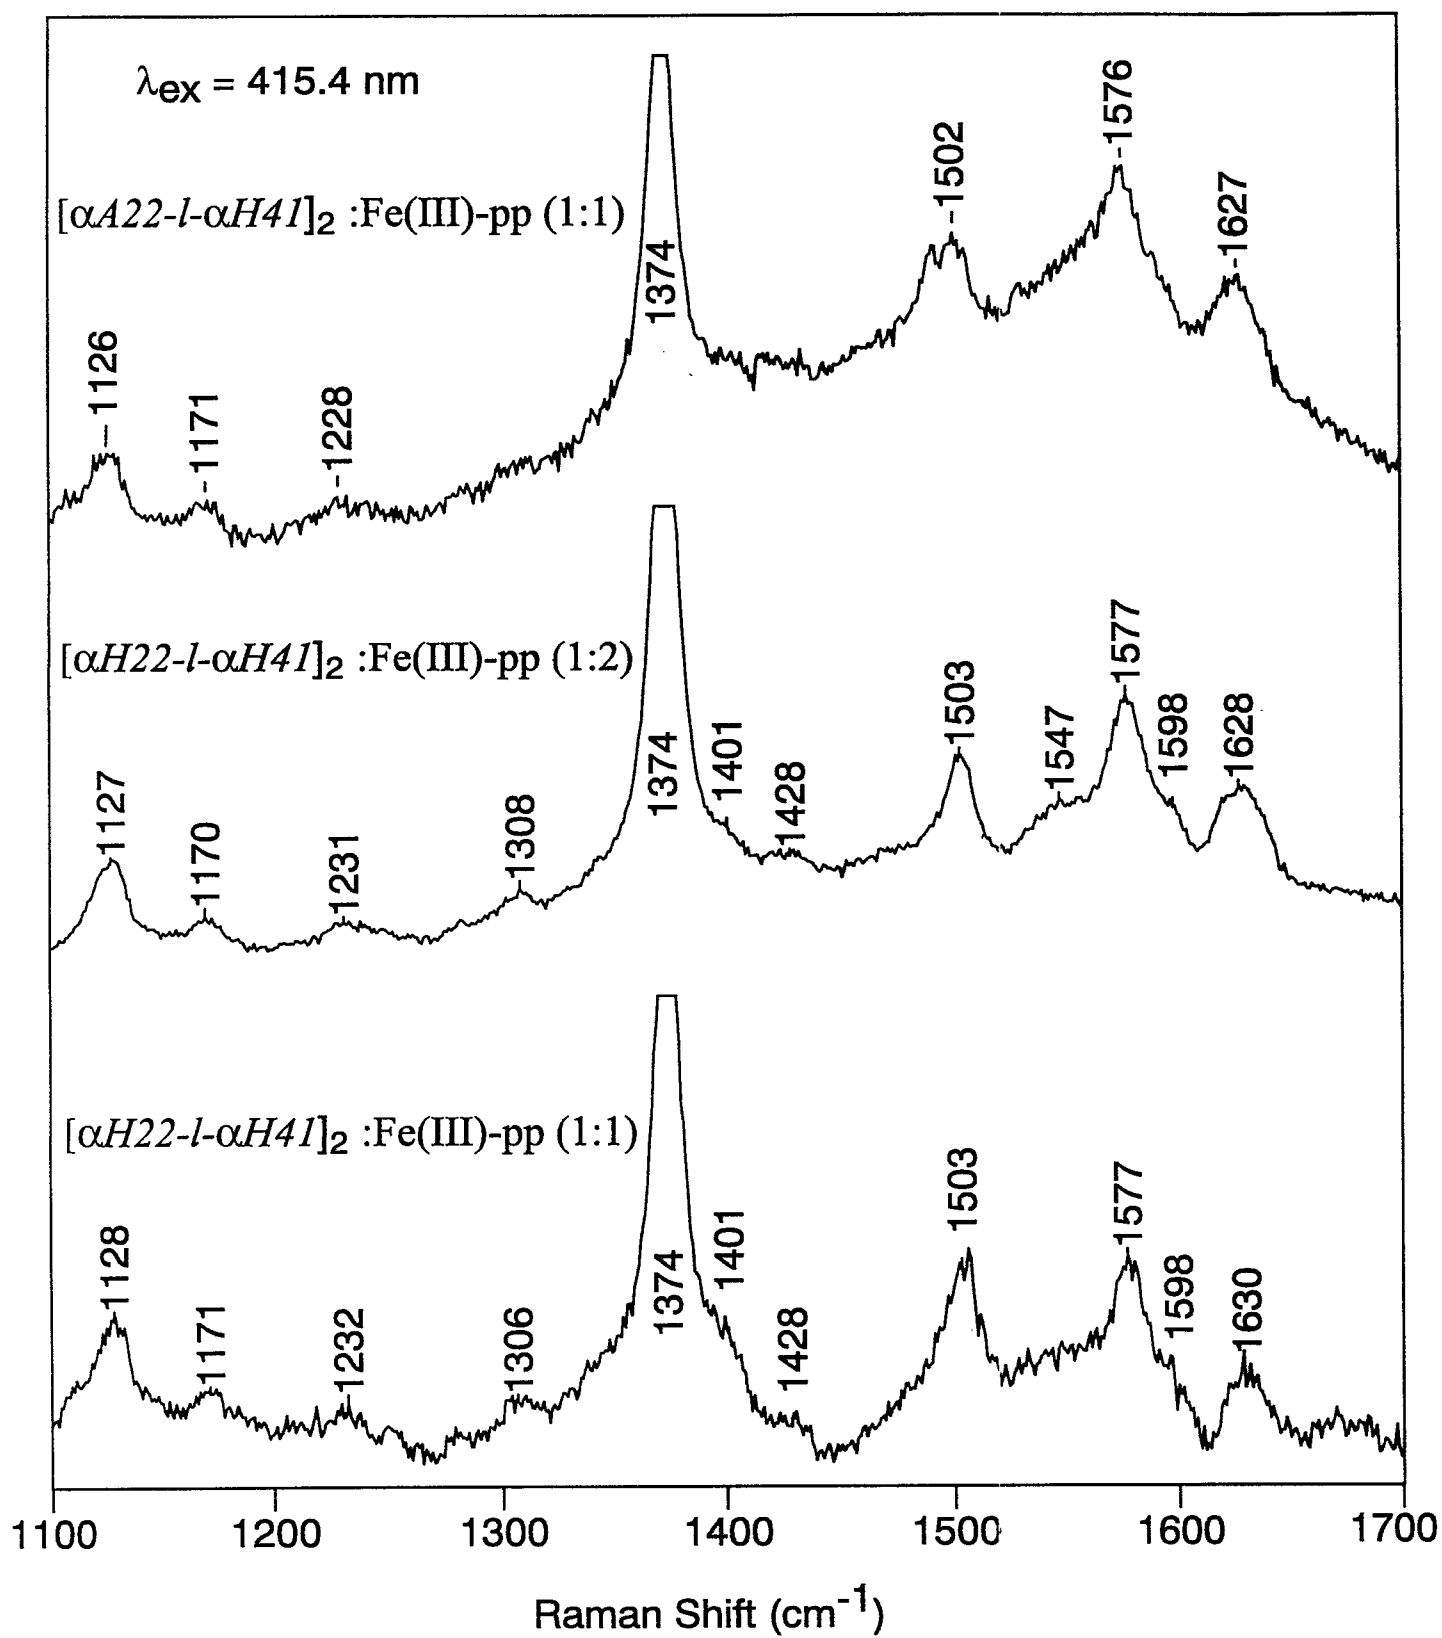

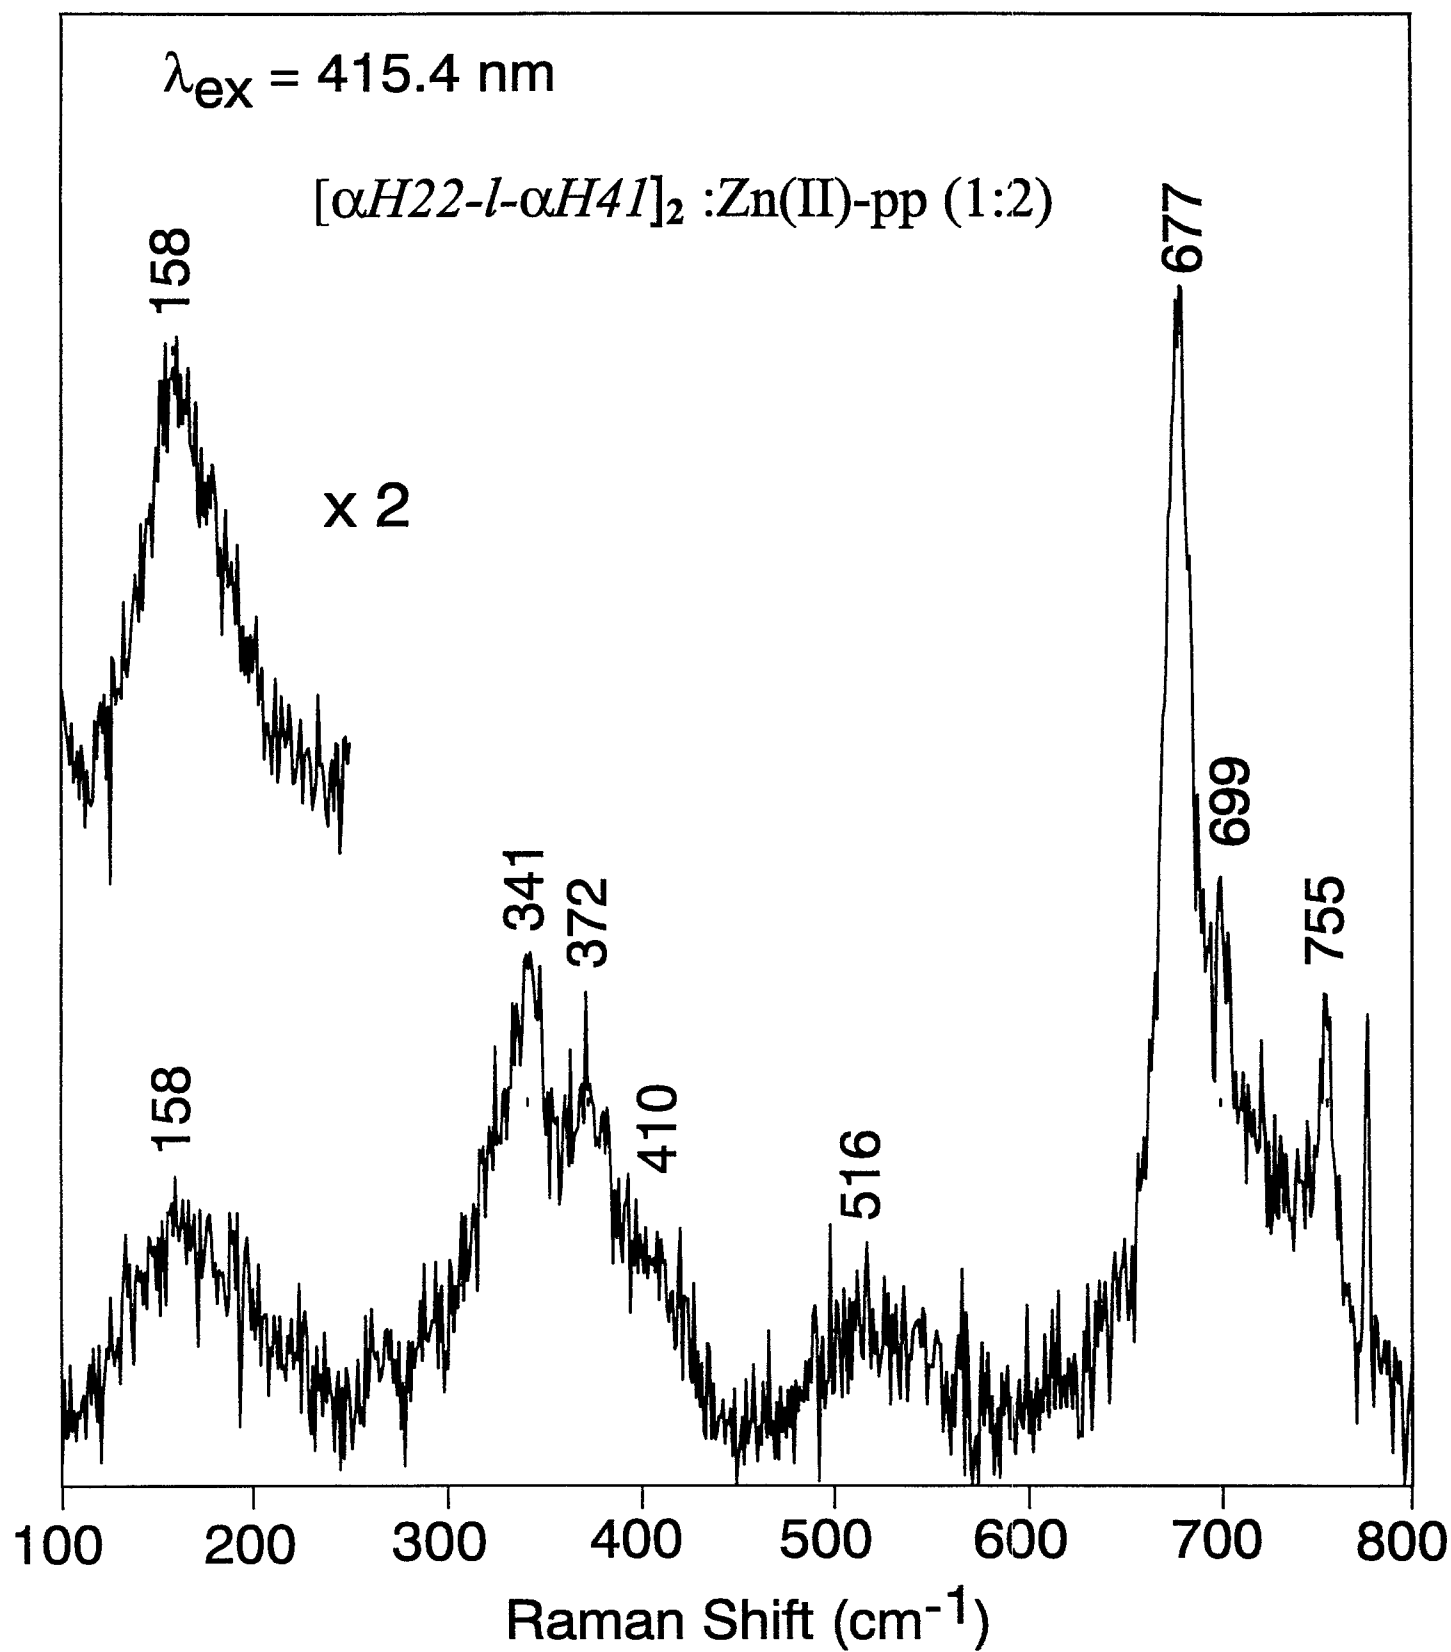

Supplement: Supplementary file 1 [file 5759127]
